# Supplementary material for: Modeling perinatal mortality in twins via generalized additive mixed models: a comparison of estimation approaches
Source: Springer Nature journal article supplement (doi:10.1186/s12874-019-0861-2), 2019-11-15
Supplement: MOESM1 [file 17393396]

# Modeling perinatal mortality in twins via generalized additive mixed models: a comparison of estimation approaches

Muhammad Abu Shadeque Mullah<sup>1</sup>, James A Hanley<sup>1</sup> and Andrea Benedetti<sup>\*1</sup>

<sup>1</sup>Department of Epidemiology, Biostatistics and Occupational Health, McGill University

## Supplementary Material

---

\*Correspondence to Dr. Andrea Benedetti, Department of Epidemiology, Biostatistics, and Occupational Health, Faculty of Medicine, McGill University, Purvis Hall, 1020 Pine Avenue West, Montreal, QC H4B 2V2, Canada (e-mail: andrea.benedetti@mcgill.ca).

# The Mixed Model Representation of the GAMMs

## Generalized Additive Mixed Models (GAMMs)

Suppose the observations for the  $j$ th member of the  $i$ th cluster consist of a response variable  $Y_{ij}$  ( $i = 1, 2, \dots, m; j = 1, 2, \dots, n_i$ ) and  $p$  covariates  $x_{ij} = (x_{1ij}, \dots, x_{pij})^T$  associated with fixed effects and  $q \times 1$  vector of covariates  $z_{ij}$  associated with random effects. For the twin-pairs data, each twin-pair is considered as a cluster so that the cluster size  $n_i = 2$  for all clusters, and  $m$  is the total number of twin-pairs. Let  $Y_i = (Y_{i1}, \dots, Y_{in_i})^T$  and define  $x_i$  and  $z_i$  similarly. Given the  $q \times 1$  vector of random effects,  $b$ , the generalized additive mixed models takes the form

$$g(\mu_i) = \beta_0 + f_1(x_{1i}) + \dots + f_p(x_{pi}) + z_i^T b, \quad (1)$$

where  $\mu_i = E(Y_i | b)$ ,  $g(\cdot)$  is a strictly monotone and differentiable link function,  $f_r(\cdot)$  ( $r = 1, \dots, p$ ) is a centered and twice-differentiable smooth function, and the random effects  $b$  are assumed to be distributed as  $N(\theta, D)$ .

## Penalized Spline Estimation

We model the smooth function  $f_r(\cdot)$  by using the thin plate regression splines of Wood [19]. Taking a large number of knots ( $K_r$ ) to ensure the desired flexibility, we form a basis matrix  $B_r$  whose elements are thin plate regression spline basis functions  $B_{rk}(x_{ri})$ . We then represent  $f_r(\cdot)$  by a regression spline

$$f_r = B_r \beta_r \quad (2)$$

and prevent overfitting by imposing the restriction

$$\beta_r^T S_r \beta_r \leq c \quad (3)$$

for some nonnegative constant  $c$ , where  $\beta_r = (\beta_{r1}, \dots, \beta_{rK_r})^T$  is a vector of basis coefficients, and  $S_r$  is a positive semi-definite penalty matrix. To ensure identifiability we choose  $B_r$  and  $\beta_r$  such that

$$\mathbf{1}^T B_r \beta_r = 0, \quad (4)$$

where  $\mathbf{1}$  is a vector of all 1s.

## The Penalized Spline as a Mixed Model

Following Wood [25], we re-parameterize  $f_r(\cdot)$  in terms of a fixed effects parameter vector  $\beta_{rF}$  and a random effects  $\beta_{rR}$  via a one-to-one transformation as

$$f_r = B_{rF} \beta_{rF} + B_{rR} \beta_{rR}, \quad (5)$$

where  $\beta_{rR} \sim N(0, \tau_r I)$  with  $\tau_r = 1/\lambda_r$ ,  $B_{rF}$  are the columns of  $B_r$  for which the penalty matrix  $S_r$  has zero eigenvalues, and  $B_{rR} = B_r U_r \sqrt{D_r^{-1}}$  in which  $U_r$  is the matrix containing eigenvectors of  $S_r$  corresponding to the strictly positive eigenvalues arranged in descending order of magnitude ( $E_r$ ), and  $D_r$  is the diagonal matrix containing  $E_r$  on the leading diagonal.

# GAMMs as Generalized Linear Mixed Models (GLMMs)

Substituting (5) in (1), we obtain

$$g(\mu) = B_F\beta_F + B_R\beta_R + Zb, \quad (6)$$

where  $\mu = (\mu_1, \dots, \mu_m)^T$ ,  $B_F = (\mathbf{1}, B_{1F}, \dots, B_{pF})$  is the fixed effects design matrix,  $B_R = (B_{1R}, \dots, B_{pR})$  is the random effects design matrix associated with the smooth functions,  $Z = (z_1, \dots, z_q)$  is the typical random effects model matrix,  $\beta_F = (\beta_0, \beta_{1F}^T, \dots, \beta_{pF}^T)^T$  is a vector of fixed effect parameters, and  $\beta_R = (\beta_{1R}^T, \dots, \beta_{pR}^T)^T$  and  $b$  are independent random effects with distributions  $\beta_R \sim N(0, \Lambda_\tau)$  and  $b \sim N(0, D_\gamma)$  in which  $\Lambda_\tau = \text{diag}(\tau_1 I, \dots, \tau_p I)$ . The GAMM (6) can be written more compactly in the form of a GLMM as

$$g(\mu) = \underline{X}\beta_F + \underline{Z}u, \quad (7)$$

where  $\underline{X} = B_F$ ,  $\underline{Z} = (B_R, Z)$ ,  $u = (\beta_R, b)$ , and  $u \sim N(0, \Sigma_{\tau, \gamma})$  with

$$\Sigma_{\tau, \gamma} = \text{Cov}(u) = \begin{bmatrix} \Lambda_\tau & 0 \\ 0 & D_\gamma \end{bmatrix}.$$

## Results of Twins Mortality Data Analysis

**Table S1:** Stratified comparisons of second and firstborn twins: adjusted ORs of perinatal death obtain from the Bayesian fit of the logistic additive mixed effects models

| Variable                                      | adjusted OR<br>(95 % CI) |                   |                   | Variance of<br>random intercepts |             |             |
|-----------------------------------------------|--------------------------|-------------------|-------------------|----------------------------------|-------------|-------------|
|                                               | Bayesian-UNIF            | Bayesian-HC       | Bayesian-IG       | Bayesian-UNIF                    | Bayesian-HC | Bayesian-IG |
| <b>Birth weight, heavier in %<sup>a</sup></b> |                          |                   |                   |                                  |             |             |
| Heavier firstborn twin                        |                          |                   |                   |                                  |             |             |
| ≥ 25%                                         | 3.56 (2.38, 4.82)        | 3.42 (2.47, 4.70) | 3.37 (2.30, 4.54) | 3.9                              | 3.5         | 2.1         |
| 15 to < 25%                                   | 2.05 (1.52, 2.60)        | 1.97 (1.58, 2.49) | 1.94 (1.47, 2.41) | 6.1                              | 5.5         | 3.3         |
| 5 to < 15%                                    | 1.44 (1.16, 1.66)        | 1.39 (1.20, 1.62) | 1.37 (1.12, 1.57) | 4.9                              | 4.4         | 2.6         |
| Similar birth weight                          |                          |                   |                   |                                  |             |             |
| within ± 5%                                   | 1.32 (1.09, 1.45)        | 1.27 (1.13, 1.43) | 1.25 (1.05, 1.38) | 6.0                              | 5.4         | 3.1         |
| Heavier secondborn twin                       |                          |                   |                   |                                  |             |             |
| 5 to < 15%                                    | 1.24 (0.94, 1.44)        | 1.19 (0.97, 1.40) | 1.17 (0.90, 1.35) | 5.2                              | 4.7         | 2.7         |
| 15 to < 25%                                   | 0.95 (0.69, 1.23)        | 0.91 (0.71, 1.20) | 0.89 (0.66, 1.16) | 6.2                              | 5.6         | 3.3         |
| ≥ 25%                                         | 0.34 (0.24, 0.46)        | 0.33 (0.25, 0.45) | 0.32 (0.23, 0.43) | 3.6                              | 3.3         | 2.0         |

<sup>a</sup> Birthweight difference in percentage comparing the heavier vs lighter twins.
